# Supplementary material for: Progressive pulmonary fibrosis: an expert group consensus statement
Source: PubMed Central journal article supplement — Eur Respir J. 2023 Mar 30;61(3):2103187. doi: 10.1183/13993003.03187-2021 (PMC10060665; doi:10.1183/13993003.03187-2021), 2023-03-30

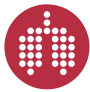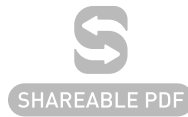

# Progressive pulmonary fibrosis: an expert group consensus statement

Sujeet K. Rajan <sup>1</sup>, Vincent Cottin <sup>2</sup>, Raja Dhar <sup>3</sup>, Sonye Danoff <sup>4</sup>, Kevin R. Flaherty <sup>5</sup>, Kevin K. Brown <sup>6</sup>, Anant Mohan <sup>7</sup>, Elizabeth Renzoni <sup>8</sup>, Murali Mohan <sup>9</sup>, Zarir Udwadia <sup>10</sup>, Padmanabha Shenoy <sup>11</sup>, David Currow <sup>12</sup>, Anand Devraj <sup>13</sup>, Bhavin Jankharia <sup>14</sup>, Ritu Kulshrestha <sup>15</sup>, Steve Jones <sup>16</sup>, Claudia Ravaglia <sup>17</sup>, Silvia Quadrelli <sup>18</sup>, Rajam Iyer <sup>19</sup>, Sahajal Dhooria <sup>20</sup>, Martin Kolb <sup>21,23</sup> and Athol U. Wells <sup>22,23</sup>

<sup>1</sup>Bombay Hospital Institute of Medical Sciences and Bhatia Hospital, Mumbai, India. <sup>2</sup>National French Reference Coordinating Center for Rare Pulmonary Diseases, Louis Pradel Hospital Hospices Civils de Lyon, Université Claude Bernard Lyon 1, INRAE, Member of ERN-LUNG, Lyon, France. <sup>3</sup>CK Birla Hospitals, Kolkata, India. <sup>4</sup>Johns Hopkins School of Medicine, Baltimore, MD, USA. <sup>5</sup>University of Michigan, Ann Arbor, MI, USA. <sup>6</sup>Department of Medicine, National Jewish Health, Denver, CO, USA. <sup>7</sup>All India Institute of Medical Sciences, New Delhi, India. <sup>8</sup>Royal Brompton Hospital/Imperial College London, London, UK. <sup>9</sup>Narayana Health, Bengaluru, India. <sup>10</sup>Breach Candy Hospital, Mumbai, India. <sup>11</sup>Department of Rheumatology, Centre for Arthritis and Rheumatism Excellence, Kochi, India. <sup>12</sup>University of Technology, Sydney, Australia. <sup>13</sup>Department of Radiology, Royal Brompton Hospital, London, UK. <sup>14</sup>Picture This by Jankharia, Mumbai, India. <sup>15</sup>Department of Pathology, Vallabhshai Patel Chest Institute, University of Delhi, Delhi, India. <sup>16</sup>European Idiopathic Pulmonary Fibrosis Federation (EU-IPFF), Peterborough, UK. <sup>17</sup>Pulmonology Unit, GB Morgagni Hospital/University of Bologna, Forlì, Italy. <sup>18</sup>Hospital Británico de Buenos Aires, Buenos Aires, Argentina. <sup>19</sup>Bhatia Hospital and PD Hinduja Hospital, Mumbai, India. <sup>20</sup>Department of Pulmonary Medicine, Postgraduate Institute of Medical Education and Research, Chandigarh, India. <sup>21</sup>Firestone Institute for Respiratory Health, St Joseph's Healthcare and McMaster University, Hamilton, ON, Canada. <sup>22</sup>Interstitial Lung Disease Unit, Royal Brompton and Harefield NHS Foundation Trust, London, UK. <sup>23</sup>Co-senior authors.

Corresponding author: Sujeet K. Rajan ([skrajan@hotmail.com](mailto:skrajan@hotmail.com))

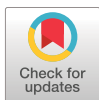

Shareable abstract (@ERSpublications)

**Progressive pulmonary fibrosis (PPF) explains what clinicians increasingly face in practice. Assessing ILD progression, its risk and improved treatments based on current evidence for PPF (despite initial management) form the mainstay of this document.** <http://bit.ly/3GLdqfs>

**Cite this article as:** Rajan SK, Cottin V, Dhar R, *et al.* Progressive pulmonary fibrosis: an expert group consensus statement. *Eur Respir J* 2023; 61: 2103187 [DOI: 10.1183/13993003.03187-2021].

This single-page version can be shared freely online.

Copyright ©The authors 2023.

This version is distributed under the terms of the Creative Commons Attribution Non-Commercial Licence 4.0. For commercial reproduction rights and permissions contact [permissions@ersnet.org](mailto:permissions@ersnet.org)

Received: 22 Dec 2021  
Accepted: 17 Nov 2022

## Abstract

This expert group consensus statement emphasises the need for standardising the definition of progressive fibrosing interstitial lung diseases (F-ILDs), with an accurate initial diagnosis being of paramount importance in ensuring appropriate initial management. Equally, case-by-case decisions on monitoring and management are essential, given the varying presentations of F-ILDs and the varying rates of progression. The value of diagnostic tests in risk stratification at presentation and, separately, the importance of a logical monitoring strategy, tailored to manage the risk of progression, are also stressed. The term “progressive pulmonary fibrosis” (PPF) exactly describes the entity that clinicians often face in practice. The importance of using antifibrotic therapy early in PPF (once initial management has failed to prevent progression) is increasingly supported by evidence. Artificial intelligence software for high-resolution computed tomography analysis, although an exciting tool for the future, awaits validation. Guidance is provided on pulmonary rehabilitation, oxygen and the use of non-invasive ventilation focused specifically on the needs of ILD patients with progressive disease. PPF should be differentiated from acute deterioration due to drug-induced lung toxicity or other forms of acute exacerbations. Referral criteria for a lung transplant are discussed and applied to patient needs in severe diseases where transplantation is not realistic, either due to access limitations or transplantation contraindications. In conclusion, expert group consensus guidance is provided on the diagnosis, treatment and monitoring of F-ILDs with specific focus on the recognition of PPF and the management of pulmonary fibrosis progressing despite initial management.

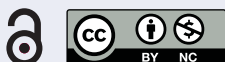

Supplement: ERJ-03187-2021.Shareable.pdf [file ERJ-03187-2021.Shareable.pdf]
